# Supplementary material for: Interaction of PIN and PGP transport mechanisms in auxin distribution-dependent development
Source: Oxford University Press journal article supplement (doi:10.1242/dev.021071), 2008-09-12
Supplement: dev021071-sup-021071-figs1.pdf [file dev021071-sup-021071-figs1.pdf]

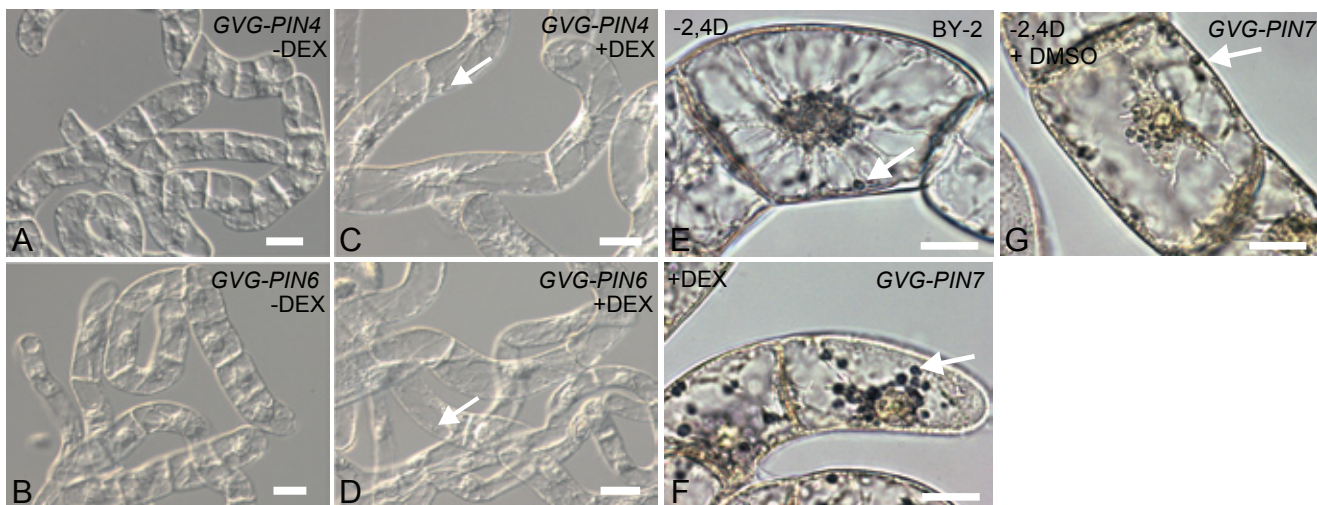

PIN-dependent increase in cell length in inducible (*GVG-PIN4*, *GVG-PIN6* and *GVG-PIN7*) and constitutive (*PIN1::PIN1:GFP*) BY-2 cell lines

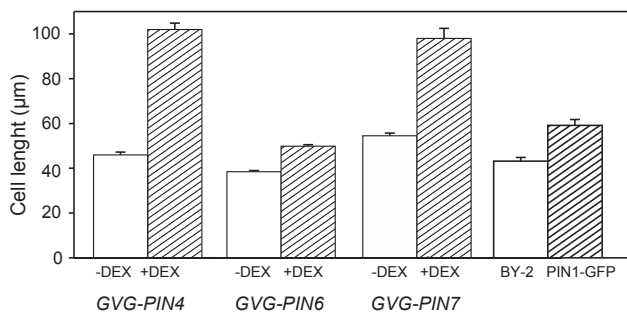

H

Accumulation assay in *PIN1::PIN1-GFP* BY-2 cell lines

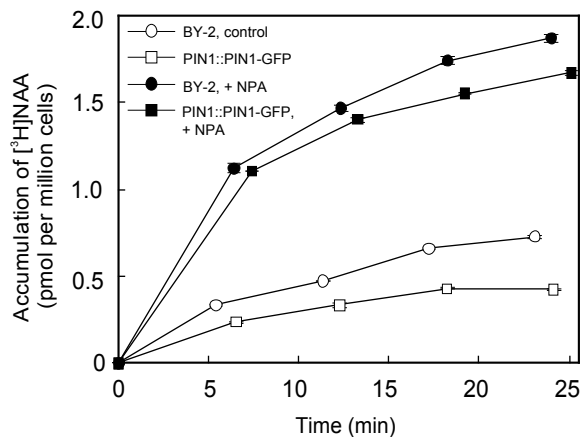

I

*GVG-PIN7* and *GVG-PGP19-HA* cells - quantification of length

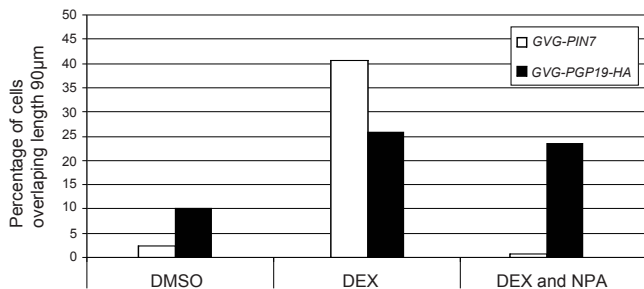

J

*GVG-PIN7* and *GVG-PGP19-HA* cells - Arithmetic means of lengths and diameters

| <i>GVG-PIN7</i>                 | DMSO     |           | DEX      |          | DEX and NPA |          |
|---------------------------------|----------|-----------|----------|----------|-------------|----------|
|                                 | length   | diameter  | length   | diameter | length      | diameter |
| arithmetic mean± standard error | 54.6±1.2 | 27.6±0.41 | 98.0±4.5 | 38.0±1.0 | 44.3±1.1    | 26.9±0.6 |
| <i>GVG-PGP19-HA</i>             | DMSO     |           | DEX      |          | DEX and NPA |          |
|                                 | length   | diameter  | length   | diameter | length      | diameter |
| arithmetic mean± standard error | 63.8±1.6 | 23.3±0.3  | 78.0±2.0 | 25.9±0.4 | 75.8±1.9    | 26.8±0.5 |

K
