# Supplementary figures and images for: Interaction of PIN and PGP transport mechanisms in auxin distribution-dependent development
Source: Oxford University Press journal article supplement (doi:10.1242/dev.021071), 2008-09-12

*GVG-PGP19-HA*

light

dark

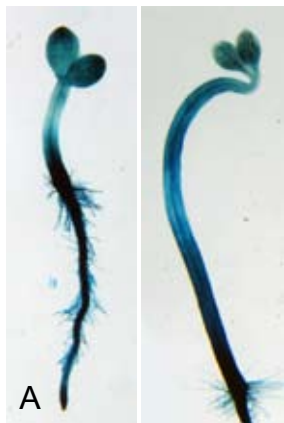

*GVG-PGP1-myc*

light

dark

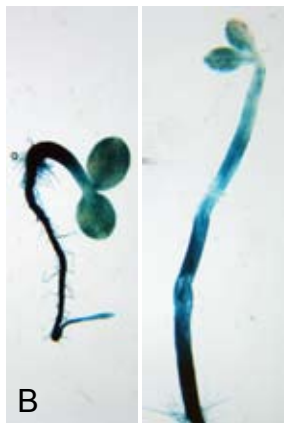

PGP19

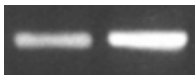

Act.

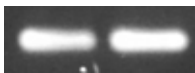

C

-DEX +DEX

PGP1

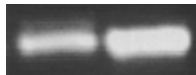

Act.

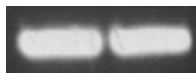

D

-DEX +DEX

Supplement: dev021071-sup-021071-figs2.pdf [file dev021071-sup-021071-figs2.pdf]

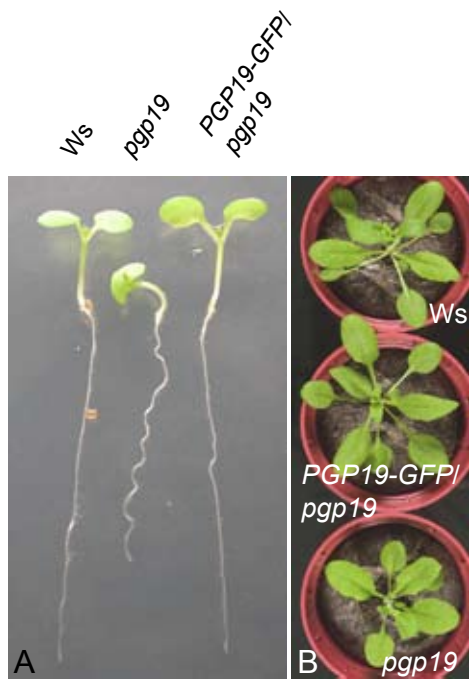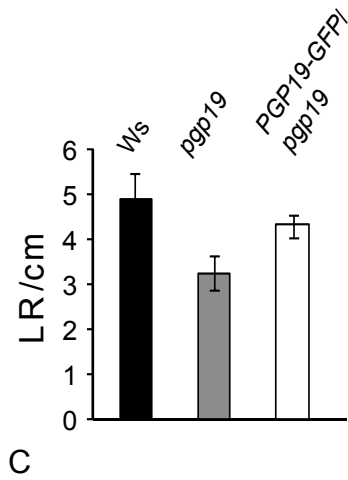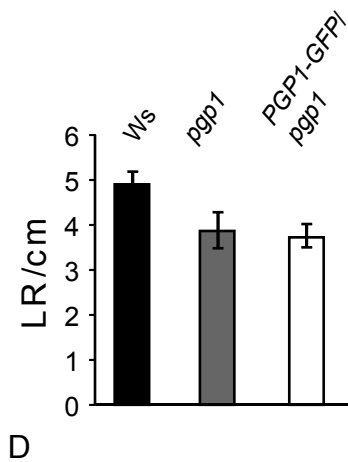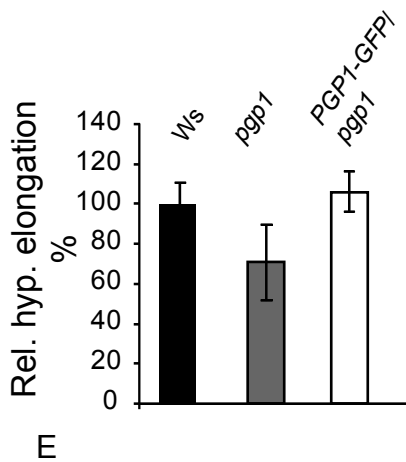

Supplement: dev021071-sup-021071-figs3.pdf [file dev021071-sup-021071-figs3.pdf]

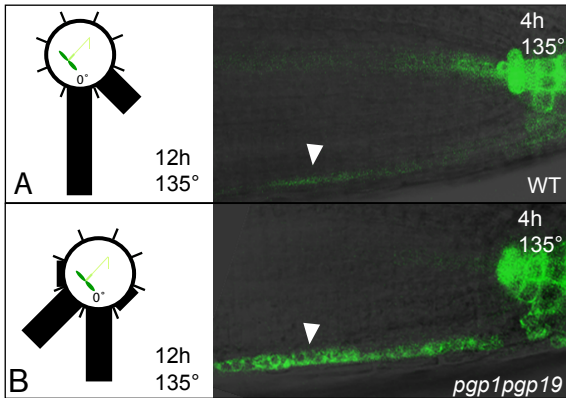

Supplement: dev021071-sup-021071-figs4.pdf [file dev021071-sup-021071-figs4.pdf]
